# Supplementary material
Source: PubMed Central journal article supplement (PMC6124344)
Supplement: mmc1.pdf [file mmc1.pdf]

### Survey Questions:

**1) What is your role as a healthcare provider?**

- Nurse Practitioner/ Physician Assistant
- Resident
- Fellow
- Staff Physician

**2) What is your primary work area?**

- Primary care
- General internal medicine
- Family medicine
- Cardiology
- Vascular medicine
- Vascular surgery

**3) How many years have you been in practice (post-training)?**

- 0-5
- 6-10
- 11-15
- 16-20
- 20+

**4) Do you currently care for patients with PAD in your practice?**

- Yes
- No

**5) How many PAD cases do you see in your workplace, on average, per month?**

- 0
- 1-5
- 6-10
- >10

**6) On a scale from 1 to 5 with 1 being “Not comfortable” and 5 being “Very comfortable”, how comfortable are you discussing guideline recommended risk factor modification strategies for patients with PAD?**

- 1
- 2
- 3
- 4
- 5

**7) Do you use AME (Ask Mayo Expert) information for PAD risk factor modification?**

- Not at all
- Occasionally
- Often

**8) On a scale from 1 to 5, how much influence do recommendations of PAD risk modifications from AME (Ask Mayo Expert) have in your practice?**

- 1       2       3       4       5

**9) On a scale from 1 to 5, how helpful would it be to your practice to have automatic secondary prevention recommendations for PAD to your patient encounters?**

- 1       2       3       4       5

**10) On a scale from 1 to 5, how helpful would it be to your practice to have an automated EHR (electronic health record) derived score for mortality risk in PAD patients?**

- 1       2       3       4       5

This appendix has not been edited, and the authors take responsibility for the accuracy of all data.
