# Supplementary material
Source: PubMed Central journal article supplement (PMC6124344)
Supplement: mmc2.pdf [file mmc2.pdf]

**Supplemental Figure 1: Roles of Providers Respondents**

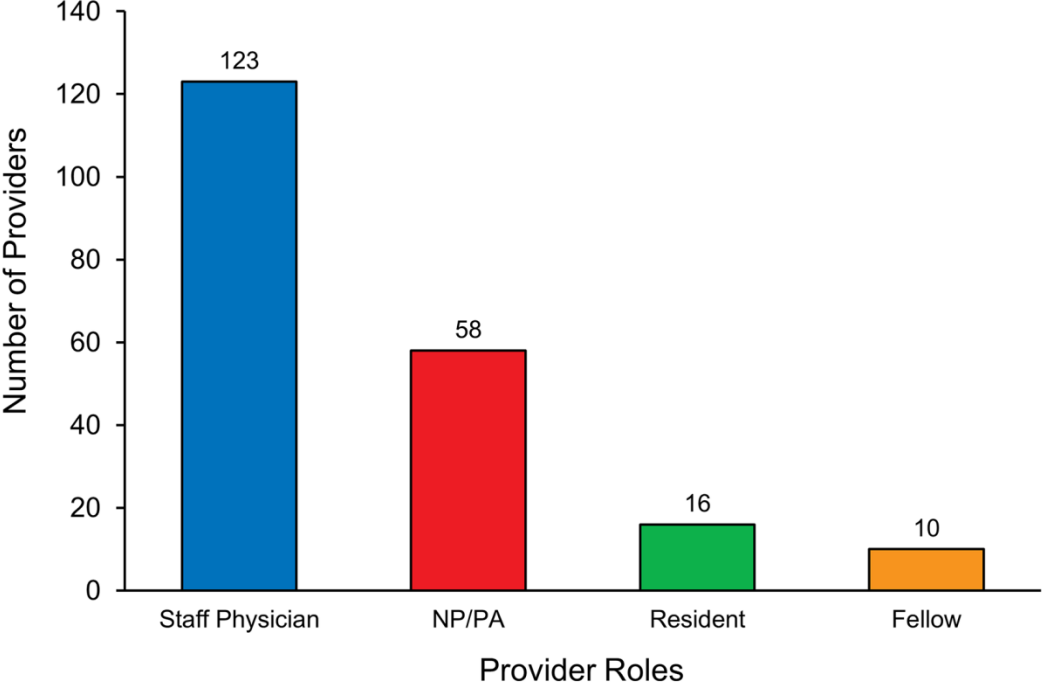

**Legend:** NP = nurse practitioners; PA = physician assistants

This figure has not been edited, and the authors take responsibility for the accuracy of all data.
